# Supplementary material for: Theoretical description of the role of amine surfactant on the anisotropic growth of gold nanocrystals
Source: Royal Society of Chemistry journal article supplement (doi:10.1039/c6ce00550k), 2016-01-01
Supplement: c6ce00550k1.pdf [file c6ce00550k1.pdf]

## Supporting Information

### **Theoretical Description of the Role of Amine Surfactant on the Anisotropic Growth of Gold Nanocrystals**

Hongjun You,<sup>\*a</sup> Xiaotong Liu,<sup>a</sup> Hongzhong Liu<sup>b</sup> and Jixiang Fang<sup>\*a</sup>

<sup>a</sup> School of Science, State Key Laboratory for Mechanical Behavior of Materials, Xi'an Jiaotong University, Shannxi 710049, P.R. China

<sup>b</sup> School of Mechanical Engineering, Xi'an Jiaotong University, Shannxi 710049, P.R. China

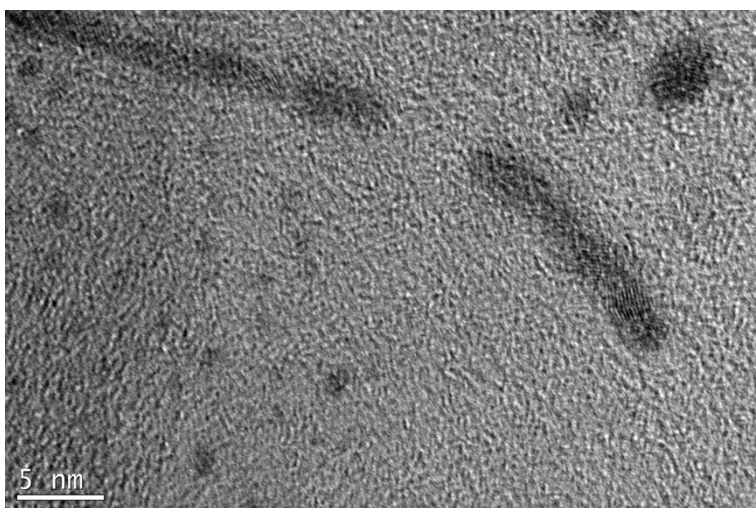

**Fig. S1** TEM image of Au nanowires and nanoparticles formed in the synthetic solution after aging 24 h.

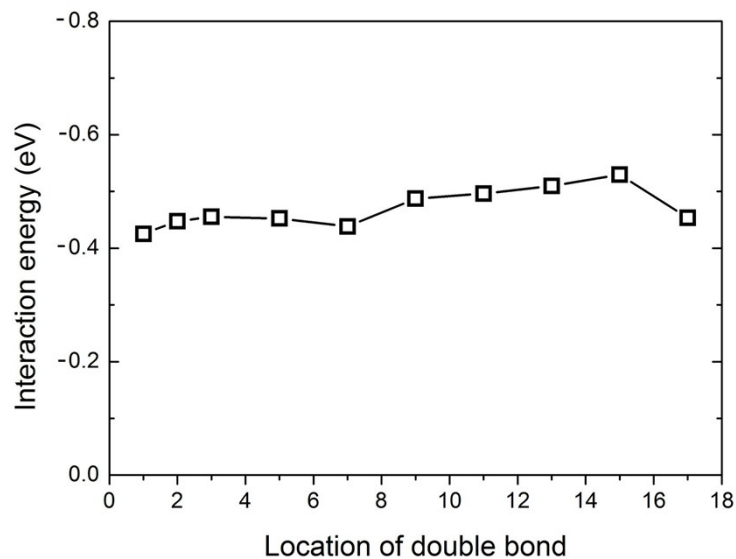

**Fig. S2** Interaction energy of per molecule obtained from the aggregation of 3 amine molecules with 18 carbon-atoms-chain *vis* the position of one double band changes from 1<sup>st</sup> to 17<sup>th</sup> carbon bond neighboring to the amine functional group.

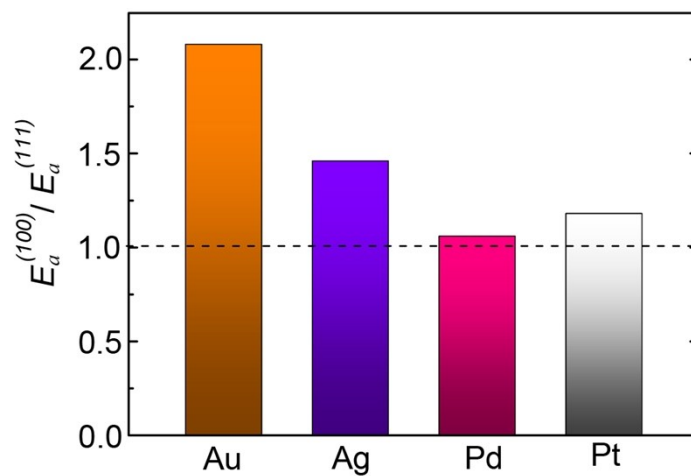

**Fig. S3** Histogram for the ratio of adsorption energies ( $E_a^{(100)}/E_a^{(111)}$ ) of amine molecule adsorbed on noble metals (Ag, Pd, Pt, Au) (100) and (111) surfaces.

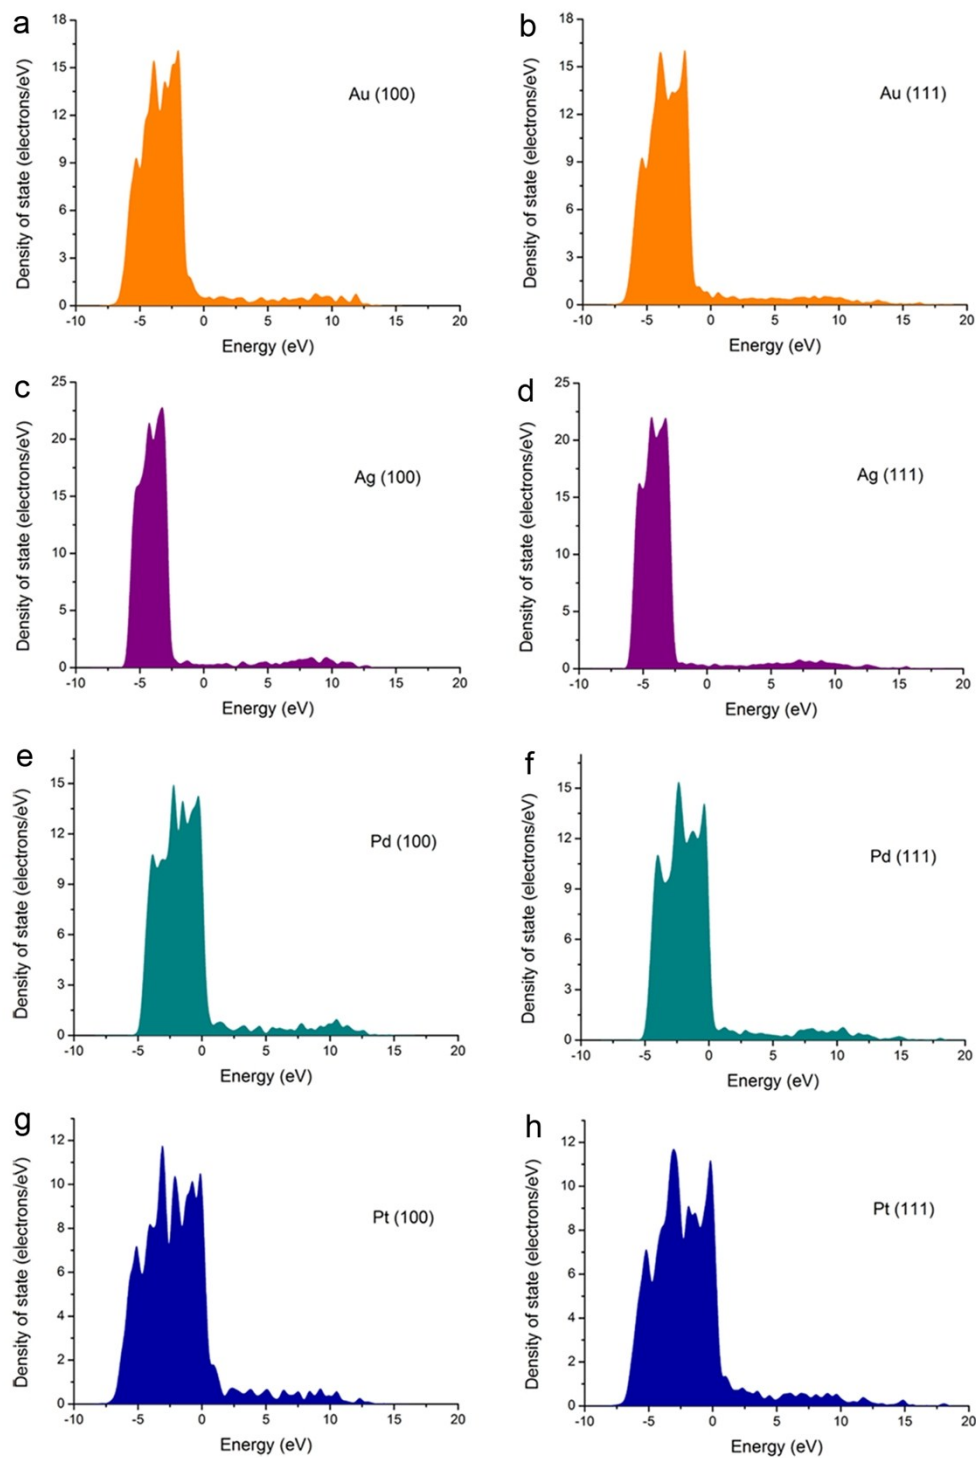

**Fig. S4** Density of state (DOS) of *d*-band electrons, obtained from density functional theory (DFT) calculations, for the (a) Au (100), (b) Au (111), (c) Ag (100), (d) Ag (111), (e) Pd (100), (f) Pd (111), (g) Pt (100), and (h) Pt (111) surfaces.

**Table S1.** Values of  $d$ -Band Center Position Obtained from DOS Analysis in Fig. S4 for Noble Metals (Ag, Pd, Pt, Au) (100) and (111) Surfaces (Unit: eV).

| Noble metal | (100) surface | (111) surface | Difference |
|-------------|---------------|---------------|------------|
| Au          | -3.24         | -3.35         | 0.11       |
| Ag          | -3.95         | -3.98         | 0.03       |
| Pd          | -1.84         | -1.88         | 0.04       |
| Pt          | -2.21         | -2.19         | 0.03       |

**Table S2.** Adsorption Energy of Ammonia and Methylamine molecules, Obtained from DFT Calculations, on Au (100), (111) and (110) Surfaces (Unit: eV).

| Molecule    | $E_a^{(100)}$ | $E_a^{(111)}$ | $E_a^{(110)}$ |
|-------------|---------------|---------------|---------------|
| Ammonia     | -0.541        | -0.251        | -0.551        |
| Methylamine | -0.623        | -0.298        | -0.628        |

**Table S3.** Surface Energies ( $E_s$ ) Obtained from DFT Calculation for Noble Metals (Ag, Pd, Pt, Au) (100), (111) and (110) Surfaces (Unit: J/m<sup>2</sup>)

| Noble metal | (100) surface | (111) surface | (110) surface |
|-------------|---------------|---------------|---------------|
| Au          | 1.02          | 0.91          | 1.09          |
| Ag          | 1.04          | 1.01          | 1.11          |
| Pd          | 1.67          | 1.53          | 1.89          |
| Pt          | 2.35          | 2.12          | 2.42          |

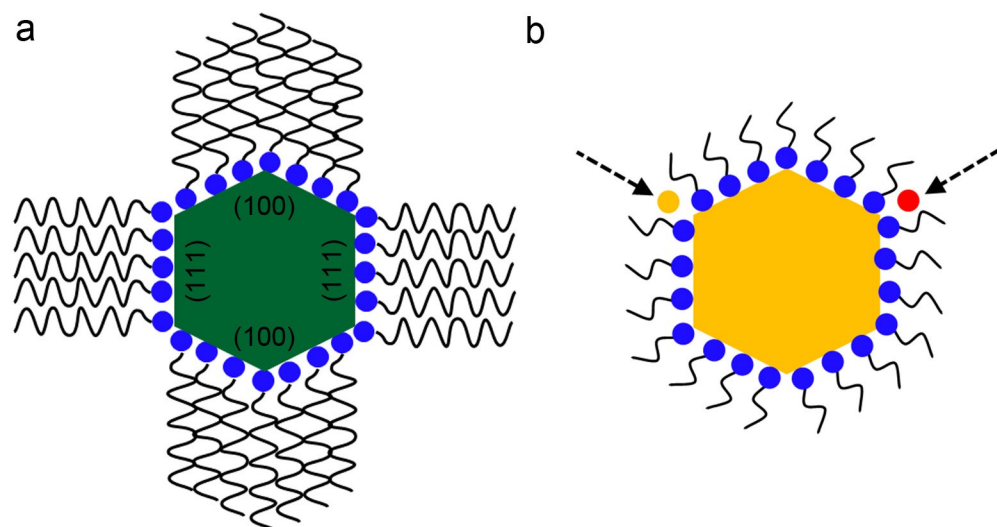

**Fig. S5** Schematic image of (a) configuration of OAm molecules adsorbed on Pt or Pd nanoparticle as surfactant, and (b) Au nanoparticle adsorbed by short-carbon-chain amine molecules.
